# Supplementary material for: Efficient iodine capture by metal–organic cubes based on hexanuclear vanadium clusters
Source: Royal Society of Chemistry journal article supplement (doi:10.1039/d3qi01501g), 2023-01-01
Supplement: d3qi01501g1.pdf [file d3qi01501g1.pdf]

## Supporting Information

# Efficient iodine capture by metal–organic cubes based on hexanuclear vanadium cluster

Yang Yang,<sup>a</sup> Yaomei Fu,<sup>b</sup> Yiran Tian,<sup>a</sup> Liang Zhao,<sup>\*a</sup> Chao Qin,<sup>a</sup> Xinlong Wang<sup>\*a,c</sup> and Zhongmin Su<sup>a,c</sup>

<sup>a</sup> *Key Laboratory of Polyoxometalate and Reticular Material Chemistry of Ministry of Education, Northeast Normal University, Changchun, 130024, China.*

<sup>b</sup> *Shandong Peninsula Engineering Research Center of Comprehensive Brine Utilization, Weifang University of Science and Technology, Shouguang, 262700, China.*

<sup>c</sup> *College of Science, Hainan University, Haikou 570228, China.*

Email: [zhaol352@nenu.edu.cn](mailto:zhaol352@nenu.edu.cn); [wangxl824@nenu.edu.cn](mailto:wangxl824@nenu.edu.cn)

## Experimental section

### General Information

Commercial reagents in this work were used as received unless specially stated. The experiments were performed under an argon atmosphere using standard Schlenk techniques.  $^1\text{H}$  NMR spectra were recorded at 25°C on a Bruker Avance 500 MHz NMR spectrometer and TMS as internal standard. The FT-IR spectra were performed in the range 3500–500  $\text{cm}^{-1}$  using KBr pellets on an Alpha Centaur FT/IR spectrophotometer. PXRD patterns were recorded from 5 to 50° at room temperature on a Siemens D5005 diffractometer with Cu  $K\alpha$  ( $\lambda = 1.5418 \text{ \AA}$ ). Thermogravimetric analysis (TGA) of the samples was performed using a Perkin Elmer TG-7 analyzer heated from 50 to 800°C under nitrogen at heating rate of 10°C  $\text{min}^{-1}$ . Elemental analyses (CHN) were conducted on a Perkin Elmer 2400 CHN elemental analyzer. The UV-Vis spectra were measured at room temperature using a VU-2550 UV-Vis Spectrophotometer. All data collections were performed on a Bruker D8-Venture diffractometer with a Turbo X-ray Source (Cu  $K\alpha$  radiation,  $\lambda = 1.5418 \text{ \AA}$ ) adopting the direct drive rotating anode technique and a CMOS detector at 173 K. The data frames were collected using the program APEX 3 and processed using the program SAINT routine in APEX 3. The structures were solved by direct methods and refined by the full-matrix least-squares on  $F^2$  using the SHELXL-2014 program. CCDC 2278526 and 2278527 (**VMOC-6** and **VMOC-7**) contain supplementary crystallographic data for this paper.

### Materials and methods

#### Synthesis of $\text{H}_4\text{PBPTA}$

*P*-cyanoacetophenone (80 mmol), 1,4-phthalaldehyde (20 mmol), and NaOH (80 mmol) were added to 200 mL of ethanol solution and stirred at room temperature for about 15 hours. Afterward, 80 mL of ammonia was added and stirred for another 24

h at room temperature. The solid was obtained by filtration, washed 3 times with ethanol, and dried in an oven. The solid was then transferred to aqueous 2 M NaOH (200 mL) and heated to reflux until there was no change in the color of the moist pH indicator paper. The reaction mass was cooled to room temperature and the solid in the reaction mass was filtered. The filtrate was acidified with dilute hydrochloric acid to pH = 1. The solid was precipitated, filtered and dried in an oven. Recrystallization in DMF and EtOH gave the product H<sub>4</sub>PBPTA (4.0 g, about 29% yield). <sup>1</sup>H NMR (DMSO, 500 MHz).  $\delta$  = 13.13 (s, 4H), 8.53 (d, 8H), 8.48 (s, 4H), 8.33 (s, 4H), 8.14 (d, 8H).

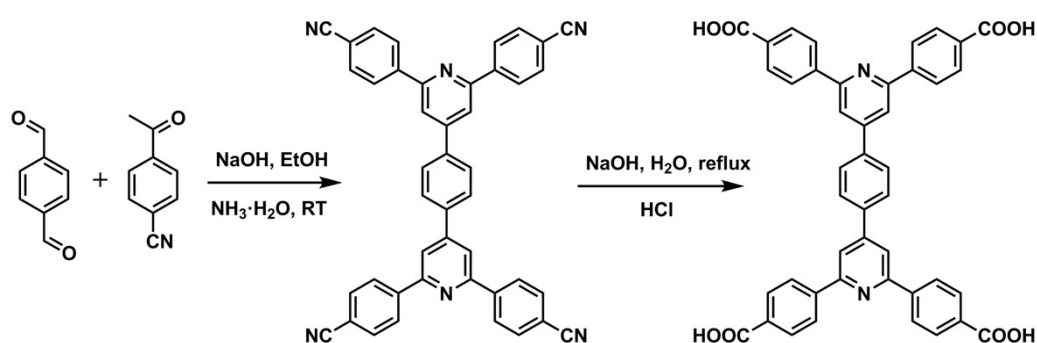

**Scheme S1.** Synthetic routes to H<sub>4</sub>PBPTA.

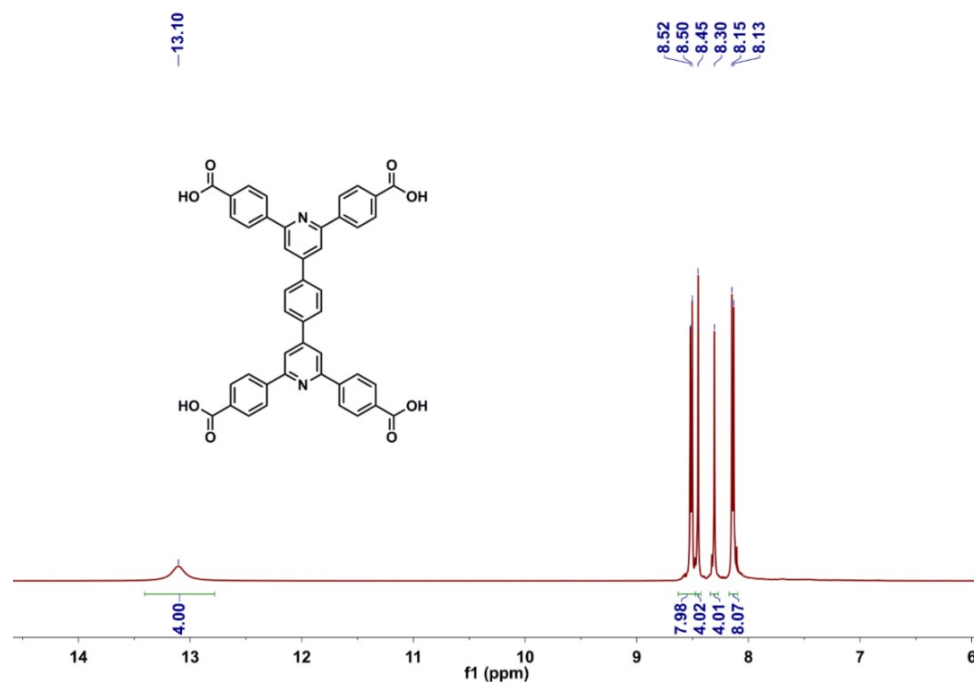

**Fig. S1.** <sup>1</sup>H NMR spectrum of H<sub>4</sub>PBPTA in DMSO-*d*<sub>6</sub>.

**Table S1.** The Crystallographic data for **VMOC-6** and **VMOC-7**.

| Compound                                               | VMOC-6                                                                                           | VMOC-7                                                                             |
|--------------------------------------------------------|--------------------------------------------------------------------------------------------------|------------------------------------------------------------------------------------|
| Empirical formula                                      | C <sub>68</sub> H <sub>488</sub> N <sub>28</sub> O <sub>200</sub> S <sub>8</sub> V <sub>48</sub> | C <sub>384</sub> H <sub>544</sub> N <sub>36</sub> O <sub>200</sub> V <sub>56</sub> |
| Formula weight                                         | 11205.43                                                                                         | 11717.16                                                                           |
| Temperature/K                                          | 173.02                                                                                           | 173.02                                                                             |
| Crystal system                                         | triclinic                                                                                        | triclinic                                                                          |
| Space group                                            | $\bar{P}1$                                                                                       | $\bar{P}1$                                                                         |
| $a/\text{\AA}$                                         | 29.845(5)                                                                                        | 29.601(3)                                                                          |
| $b/\text{\AA}$                                         | 30.189(5)                                                                                        | 29.920(3)                                                                          |
| $c/\text{\AA}$                                         | 31.613(5)                                                                                        | 31.343(3)                                                                          |
| $\alpha/^\circ$                                        | 86.200(7)                                                                                        | 87.224(4)                                                                          |
| $\beta/^\circ$                                         | 71.393(6)                                                                                        | 71.212(4)                                                                          |
| $\gamma/^\circ$                                        | 72.653(7)                                                                                        | 73.450(4)                                                                          |
| Volume/ $\text{\AA}^3$                                 | 25754(7)                                                                                         | 25162(5)                                                                           |
| Z                                                      | 1                                                                                                | 1                                                                                  |
| $\rho_{\text{calc}}/\text{g}\cdot\text{cm}^{-3}$       | 0.723                                                                                            | 0.733                                                                              |
| $\mu/\text{mm}^{-1}$                                   | 3.987                                                                                            | 4.522                                                                              |
| $F(000)$                                               | 5724.0                                                                                           | 5988.0                                                                             |
| Radiation                                              | Cu K $\alpha$ ( $\lambda = 1.54178$ )                                                            | Cu K $\alpha$ ( $\lambda = 1.54178$ )                                              |
| Theta range for data collection/ $^\circ$              | 4.176 to 62.18                                                                                   | 3.814 to 62.386                                                                    |
| Index ranges                                           | $-18 \leq h \leq 19,$<br>$-19 \leq k \leq 20,$<br>$-21 \leq l \leq 21$                           | $-19 \leq h \leq 19,$<br>$-20 \leq k \leq 19,$<br>$-20 \leq l \leq 20$             |
| Reflections collected                                  | 50315                                                                                            | 63339                                                                              |
|                                                        | 15919                                                                                            | 15774                                                                              |
| Independent reflections                                | $[R_{\text{int}} = 0.0897,$<br>$R_{\text{sigma}} = 0.1056]$                                      | $[R_{\text{int}} = 0.1002,$<br>$R_{\text{sigma}} = 0.1037]$                        |
| Data/restraints/parameters                             | 15919/8921/2502                                                                                  | 15774/7541/2500                                                                    |
| Goodness-of-fit on $F^2$                               | 1.065                                                                                            | 1.059                                                                              |
| Final $R$ indexes [ $I \geq 2\sigma(I)$ ] <sup>a</sup> | $R_1 = 0.0823$<br>$wR_2 = 0.2229$                                                                | $R_1 = 0.1080$<br>$wR_2 = 0.2882$                                                  |
| Final $R$ indexes [all data] <sup>b</sup>              | $R_1 = 0.1102$<br>$wR_2 = 0.2448$                                                                | $R_1 = 0.1498$<br>$wR_2 = 0.3244$                                                  |
| Largest diff. peak/hole/ $\text{e}\text{\AA}^{-3}$     | 0.55/-0.70                                                                                       | 0.43/-0.51                                                                         |

$${}^a R_1 = \frac{\sum ||F_o| - |F_c||}{\sum |F_o|}; {}^b wR_2 = \left\{ \frac{\sum [w(F_o^2 - F_c^2)^2]}{\sum [w(F_o^2)^2]} \right\}^{1/2}$$

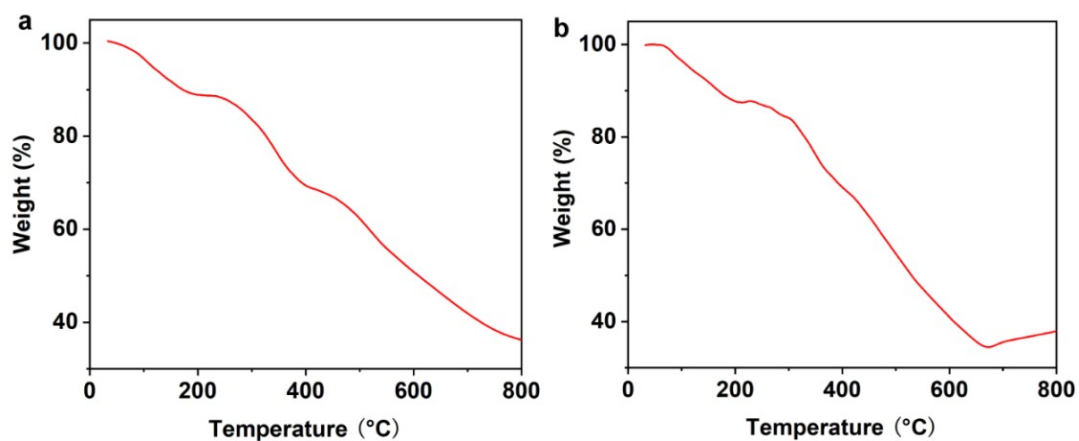

**Fig. S2.** TGA curves of **VMOC-6** (a) and **VMOC-7** (b).

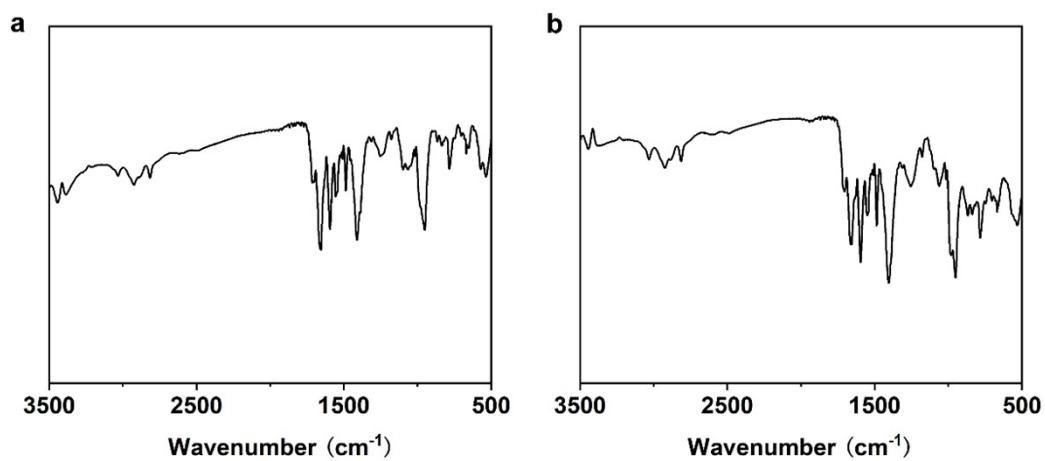

**Fig. S3.** The IR spectra of **VMOC-6** (a) and **VMOC-7** (b).

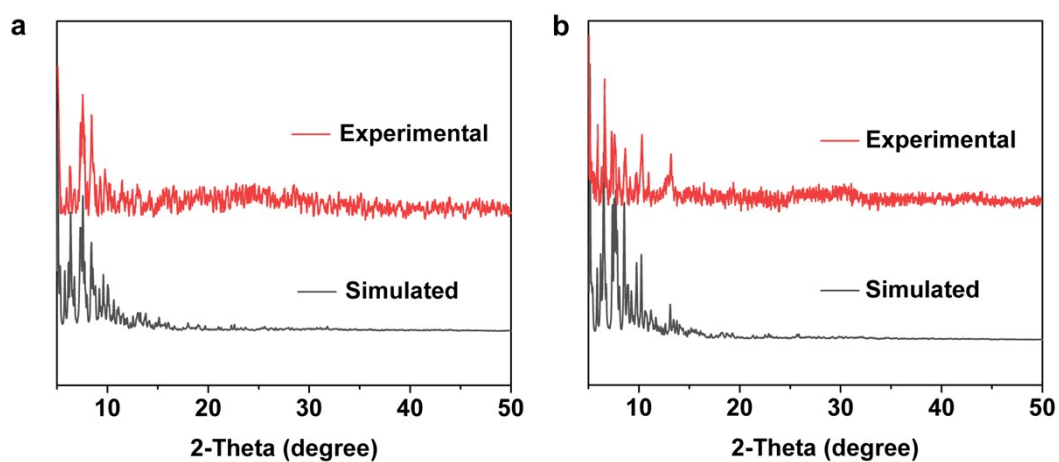

**Fig. S4.** The experimental and simulated PXRD patterns of **VMOC-6** (a) and **VMOC-7** (b).

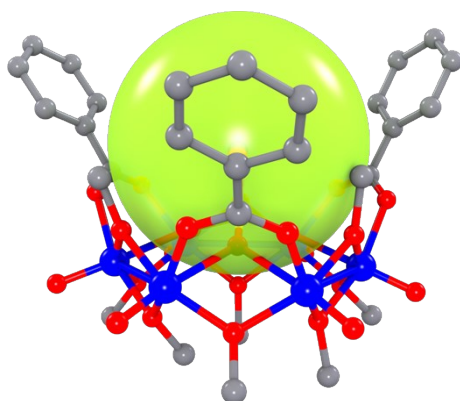

**Fig. S5.** Concave hexanuclear vanadium cluster structure.

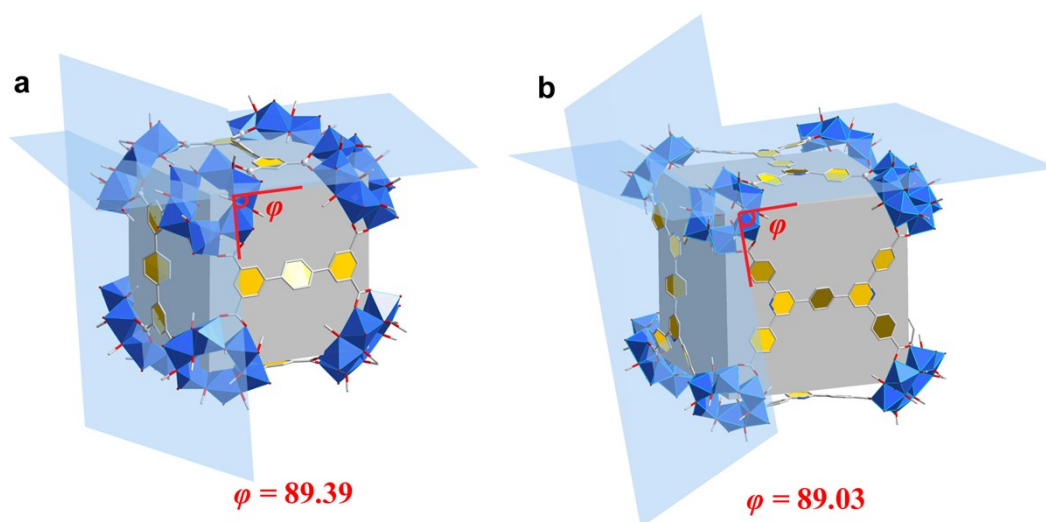

**Fig. S6.** The dihedral angles of **VMOC-4** and **VMOC-6**.

**Table S2.** The side and angle parameters of  $\eta$  and  $\varphi$  for **VMOC-4** and **VMOC-6**.

|               | $\eta$           |               | $\varphi$           |                  | $a$ (side/Å)  | $a/\text{Å}$ |
|---------------|------------------|---------------|---------------------|------------------|---------------|--------------|
|               | $\eta/^\circ$    | $\eta/^\circ$ | (dihedral angle/°)  | $\varphi/^\circ$ |               |              |
| <b>VMOC-4</b> | $\eta_1 = 64.23$ | 64.27         | $\varphi_1 = 89.64$ | 89.39            | $a_1 = 21.55$ | 21.57        |

|               |                  |       |                     |       |               |       |
|---------------|------------------|-------|---------------------|-------|---------------|-------|
|               | $\eta_2 = 63.99$ |       | $\varphi_2 = 89.79$ |       | $a_2 = 21.56$ |       |
|               | $\eta_3 = 64.60$ |       | $\varphi_3 = 88.75$ |       | $a_3 = 21.60$ |       |
|               | $\eta_1 = 59.66$ |       | $\varphi_1 = 88.30$ |       | $a_1 = 28.47$ |       |
| <b>VMOC-6</b> | $\eta_2 = 59.65$ | 59.54 | $\varphi_2 = 89.44$ | 89.03 | $a_2 = 28.17$ | 28.36 |
|               | $\eta_3 = 59.31$ |       | $\varphi_3 = 89.36$ |       | $a_3 = 28.44$ |       |

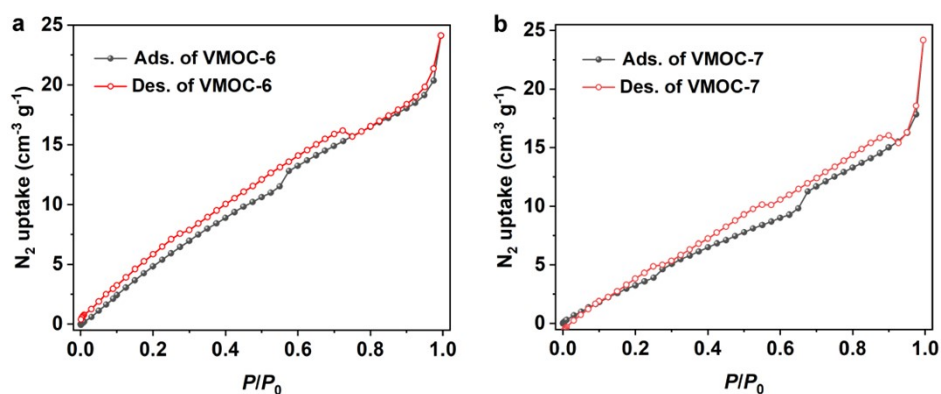

**Fig. S7.**  $N_2$  adsorption-desorption isotherms of **VMOC-6** and **VMOC-7**.

### Iodine Vapor Uptake

Iodine vapor uptake experiments were performed using the following procedure: the crystalline sample (20 mg) was weighed in a pre-weighed glass container (3 mL) and transferred to a larger sealed glass vial (20 mL) containing 800 mg of iodine at the bottom. There was no physical contact between the iodine and the caged sample as shown. The airtight container was then heated in an oven at 75°C. After iodine vapor adsorption, the cage with iodine was cooled to room temperature and weighed.

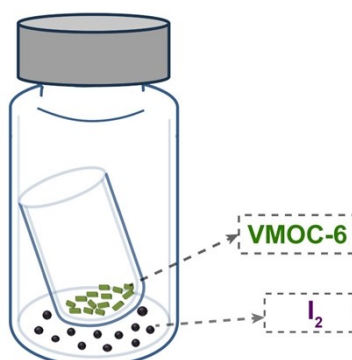

**Fig. S8.** Schematic diagram of iodine vapor uptake experiment.

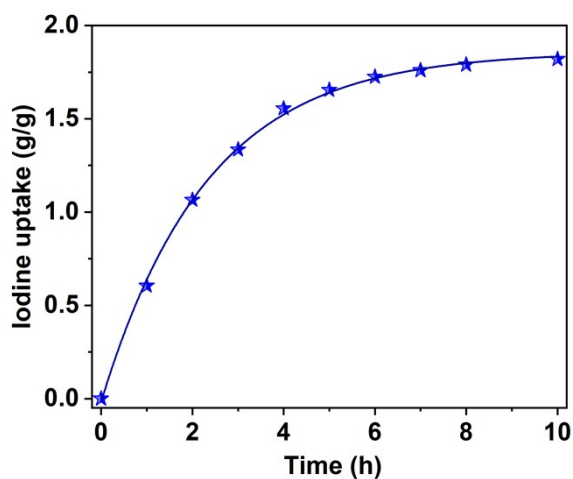

**Fig. S9.** Iodine vapor adsorption versus time for **VMOC-7** at 75°C and 1 atm.

**Table S3.** Comparison of iodine vapor adsorption in different metal–organic materials.

| Metal–Organic Materials                     | category   | Temperature (°C) | Time (h)  | Iodine uptake (g g <sup>-1</sup> ) | Ref              |
|---------------------------------------------|------------|------------------|-----------|------------------------------------|------------------|
| IL@PCN-333(Al)                              | MOF        | 75               | 0.5–48    | 7.35                               | [1]              |
| Cu@MIL-101                                  | MOF        | 77               | 12        | 3.42                               | [2]              |
| UPC-158-HF/HCl/HBr                          | MOF        | 70               | 20        | 2.19–2.92                          | [3]              |
| UiO-66-FA                                   | MOF        | 80               | 72        | 2.25                               | [4]              |
| MOF-808                                     | MOF        | 80               | 24        | 2.18                               | [5]              |
| Zn <sub>2</sub> (tptc)(apy)                 | MOF        | 75               | 60        | 2.16                               | [6]              |
| <b>VMOC-6</b>                               | <b>MOP</b> | <b>75</b>        | <b>10</b> | <b>1.83</b>                        | <b>This work</b> |
| UPC-158                                     | MOF        | 70               | 20        | 1.78                               | [3]              |
| HKUST-1                                     | MOF        | 75               | 0.5–9     | 1.75                               | [7]              |
| Cage-1                                      | MOP        | 75               | 36        | 1.42                               | [8]              |
| NU-1000                                     | MOF        | 80               | 24        | 1.45                               | [5]              |
| MFM-300(Sc/In/Fe/Al)                        | MOF        | 80               | 0.5–20    | 0.94–1.54                          | [9]              |
| MFM-300(V <sup>III</sup> /V <sup>IV</sup> ) | MOF        | 70               | 48        | 1.25–1.42                          | [10]             |
| ZIF-8                                       | MOF        | 75               | 5–12      | 1.25                               | [11]             |
| UiO-66                                      | MOF        | 80               | 72        | 1.17                               | [4]              |
| MBM                                         | MOF        | 100              | 2         | 0.98                               | [12]             |



|                                                                                          |     |    |     |             |      |
|------------------------------------------------------------------------------------------|-----|----|-----|-------------|------|
| MOF-867                                                                                  | MOF | 80 | 24  | 0.88        | [5]  |
| [Cd(pbica) <sub>2</sub> ] $\cdot$ 1.5DMF $\cdot$ 2CH <sub>3</sub> OH                     | MOF | 50 | 24  | 0.66        | [13] |
| TMBP $\cdot$ CuI                                                                         | MOF | 77 | 0.5 | 0.64        | [14] |
| Th-SINAP-13                                                                              | MOF | 80 | 6   | 0.60        | [15] |
| UiO-67                                                                                   | MOF | 80 | 24  | 0.53        | [5]  |
| HKUST-1@PES/PEI/PVDF                                                                     | MOF | 75 | 480 | 0.225–0.376 | [16] |
| [Zn <sub>2</sub> ( $\mu$ <sub>4</sub> -ao <sub>2</sub> btc)( $\mu$ -pbix) <sub>2</sub> ] | MOF | 75 | 3 d | 0.20        | [17] |
| [Zn <sub>3</sub> (BTC) <sub>2</sub> (TIB) <sub>2</sub> ]                                 | MOF | 70 | 4   | 0.04        | [18] |
| [Cd <sub>3</sub> (BTC) <sub>2</sub> (TIB) <sub>2</sub> ]                                 | MOF | 70 | 4   | 0.03        | [17] |

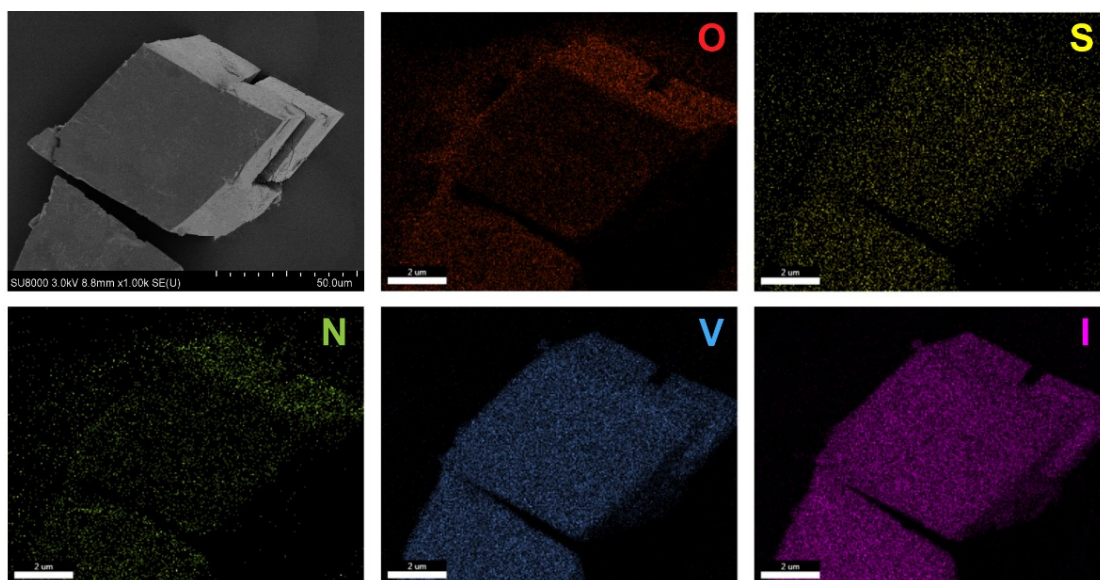

**Fig. S10.** Elemental mapping images of O, S, N, V and I for I<sub>2</sub>-laden VMOC-6.

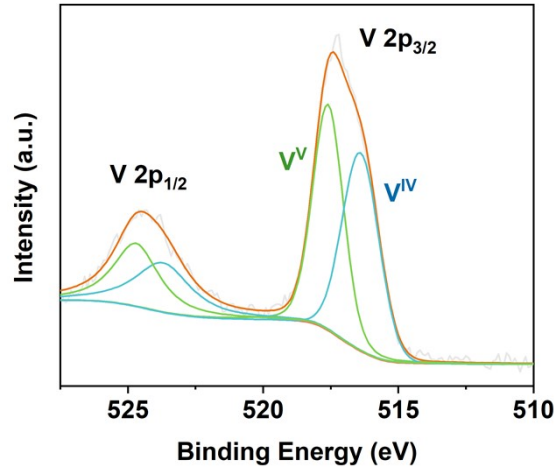

Fig. S11. XPS spectra of V 2p for I<sub>2</sub>@VMOC-6 derived signals.

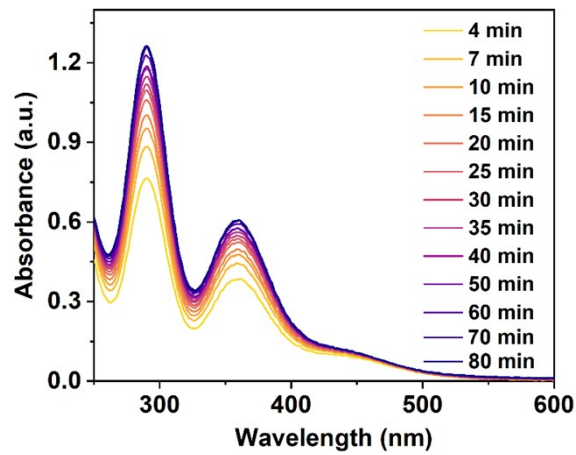

Fig. S12. Release of iodine from I<sub>2</sub>@VMOC-6 over 80 min.

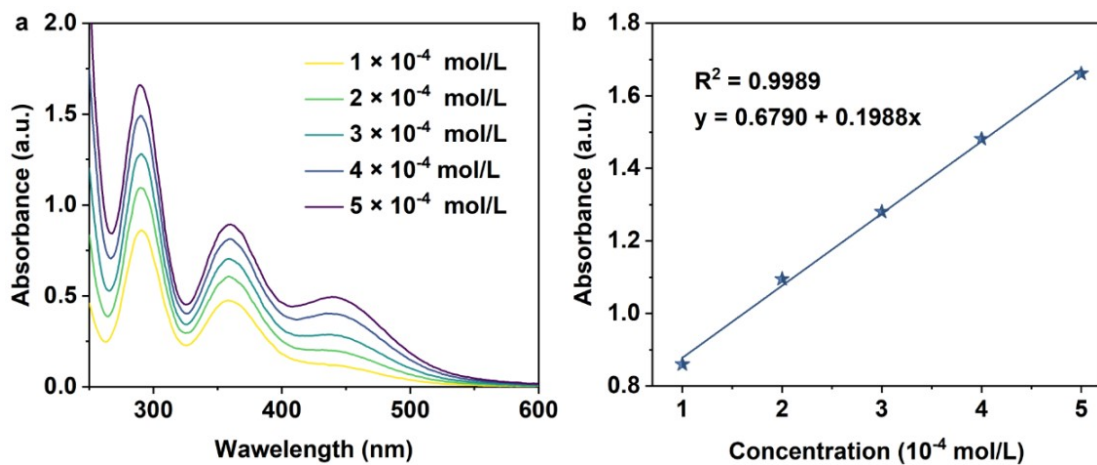

Fig. S13. (a) Calibration plot of standard iodine by UV-Vis spectra in MeOH solution.

(b) The fitting of Abs value vs concentration of iodine in cyclohexane solution.

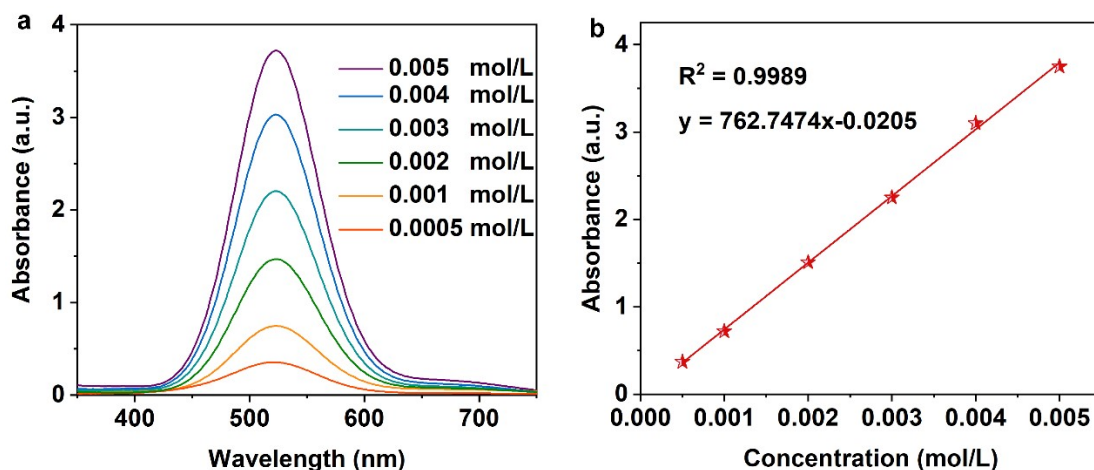

**Fig. S14.** (a) Calibration plot of standard iodine by UV-Vis spectra in cyclohexane solution. (b) The fitting of Abs value vs concentration of iodine in cyclohexane solution with the relatively good linearity satisfies Lambert-Beer Law.

## References

1. Y. Tang, H. Huang, J. Li, W. Xue and C. Zhong, IL-induced formation of dynamic complex iodide anions in IL@MOF composites for efficient iodine capture, *J. Mater. Chem. A*, 2019, **7**, 18324–18329.
2. B. Qi, Y. Liu, T. Zheng, Q. Gao, X. Yan, Y. Jiao and Y. Yang, Highly efficient capture of iodine by Cu/MIL-101, *J. Solid State Chem.*, 2018, **258**, 49–55.
3. B. Guo, F. Li, C. Wang, L. Zhang and D. Sun, A rare (3,12)-connected zirconium metal–organic framework with efficient iodine adsorption capacity and pH sensing, *J. Mater. Chem. A*, 2019, **7**, 13173–13179.
4. J. Maddock, X. Kang, L. Liu, B. Han, S. Yang and M. Schröder, The Impact of Structural Defects on Iodine Adsorption in UiO-66, *Chemistry (Switzerland)*, 2021, **3**, 525–531.
5. P. Chen, X. He, M. Pang, X. Dong, S. Zhao and W. Zhang, Iodine Capture Using Zr-Based Metal-Organic Frameworks (Zr-MOFs): Adsorption Performance and Mechanism, *Acs Appl. Mater. Inter.*, 2020, **12**, 20429–20439.
6. R.-X. Yao, X. Cui, X.-X. Jia, F.-Q. Zhang and X.-M. Zhang, A Luminescent Zinc(II) Metal-Organic Framework (MOF) with Conjugated  $\pi$ -Electron Ligand for High Iodine Capture and Nitro-Explosive Detection, *Inorg. Chem.*, 2016, **55**, 9270–9275.
7. D. F. Sava, K. W. Chapman, M. A. Rodriguez, J. A. Greathouse, P. S. Crozier, H. Zhao, P. J. Chupas and T. M. Nenoff, Competitive  $I_2$  Sorption by Cu-BTC from Humid Gas Streams, *Chem. Mater.*, 2013, **25**, 2591–2596.

8. W.-Y. Pei, J. Yang, H. Wu, W. Zhou, Y.-W. Yang and J.-F. Ma, A calix 4 resorcinarene-based giant coordination cage: controlled assembly and iodine uptake, *Chem. Commun.*, 2020, **56**, 2491–2494.
9. X. Zhang, I. da Silva, H. G. W. Godfrey, S. K. Callear, S. A. Sapchenko, Y. Cheng, I. Vitorica-Yrezabal, M. D. Frogley, G. Cinque, C. C. Tang, C. Giacobbe, C. Dejoie, S. Rudic, A. J. Ramirez-Cuesta, M. A. Denecke, S. Yang and M. Schroder, Confinement of Iodine Molecules into Triple-Helical Chains within Robust Metal–Organic Frameworks, *J. Am. Chem. Soc.*, 2017, **139**, 16289–16296.
10. X. Zhang, I. da Silva, R. Fazzi, A. M. Sheveleva, X. Han, B. F. Spencer, S. A. Sapchenko, F. Tuna, E. J. L. McInnes, M. Li, S. Yang and M. Schroder, Iodine Adsorption in a Redox-Active Metal–Organic Framework: Electrical Conductivity Induced by Host-Guest Charge-Transfer, *Inorg. Chem.*, 2019, **58**, 14145–14150.
11. D. F. Sava, M. A. Rodriguez, K. W. Chapman, P. J. Chupas, J. A. Greathouse, P. S. Crozier and T. M. Nenoff, Capture of Volatile Iodine, a Gaseous Fission Product, by Zeolitic Imidazolate Framework-8, *J. Am. Chem. Soc.*, 2011, **133**, 12398–12401.
12. T. He, X. Xu, B. Ni, H. Lin, C. Li, W. Hu and X. Wang, Metal–Organic Framework Based Microcapsules, *Angew. Chem. Int. Ed.*, 2018, **57**, 10148–10152.
13. B.-B. Shi, R.-Z. Pei, A.-W. Chen, C. Wang, Y.-M. Ma and Z. Yin, A rigid and porous metal-organic frameworks with 1D rhombus channels and double walls: Selective adsorption of CO<sub>2</sub> over N<sub>2</sub>, iodine capture, and fluorescence, *Inorganic Chemistry Communications*, 2019, **102**, 147–151.
14. J. He, J. Duan, H. Shi, J. Huang, J. Huang, L. Yu, M. Zeller, A. D. Hunter and Z. Xu, Immobilization of Volatile and Corrosive Iodine Monochloride (ICl) and I-2 Reagents in a Stable Metal–Organic Framework, *Inorg. Chem.*, 2014, **53**, 6837–6843.
15. Z.-J. Li, Y. Ju, B. Yu, X. Wu, H. Lu, Y. Li, J. Zhou, X. Guo, Z.-H. Zhang, J. Lin, J.-Q. Wang and S. Wang, Modulated synthesis and isoreticular expansion of Th-MOFs with record high pore volume and surface area for iodine adsorption, *Chem. Commun.*, 2020, **56**, 6715–6718.
16. B. Valizadeh, T. N. Nguyen, B. Smit and K. C. Stylianou, Porous Metal–Organic Framework@Polymer Beads for Iodine Capture and Recovery Using a Gas-Sparged Column, *Adv. Funct. Mater.*, 2018, **28**, 1801596.
17. M. Arici, O. Z. Yesilel, M. Tas and H. Demiral, Effect of Solvent Molecule in Pore for Flexible Porous Coordination Polymer upon Gas Adsorption and Iodine Encapsulation, *Inorg. Chem.*, 2015, **54**, 11283–11291.
18. Y. Rachuri, K. K. Bisht, B. Parmar and E. Suresh, Luminescent MOFs comprising mixed tritopic linkers and Cd<sup>II</sup>/Zn<sup>II</sup> nodes for selective detection of organic nitro compounds and iodine capture, *J. Solid State Chem.*, 2015, **223**, 23–31.
